# Supplementary material for: Single-Cell RNA Sequencing Reveals the Migration of Osteoclasts in Giant Cell Tumor of Bone
Source: Front Oncol. 2021 Aug 24;11:715552. doi: 10.3389/fonc.2021.715552 (PMC8421549; doi:10.3389/fonc.2021.715552)
Supplement: Supplementary Table 2 — Migration-associated genes. [file Table_2.xlsx]

## Sheet: Sheet1
Genes associated with cells migration obtained from GSEA	Genes associated with cells migration obtained from osteoclasts in our data	intersection
AAMP	TNFRSF14	CD44
ABCC1	ADGRE5	SEMA4D
ABHD2	SEMA4D	SPN
ABHD6	EFNB1	EFNB1
ABI2	SLC1A5	SELL
ABI3	aVb3 complex	DPP4
ABL1	GRN	HBEGF
ACAP3	aXb2 complex	CSF1
ACE	CD44	CD58
ACKR2	SLC7A1	VSIR
ACKR3	TNFRSF14	LCK
ACKR4	CD58	CCL20
ACTG1	SELPLG	SEMA7A
ACTN4	TNFRSF10D	VEGFA
ACVR1	PTGER4	DAG1
ACVR1B	CSF1	PTGER4
ACVR1C	VEGFA	PLXND1
ACVRL1	FPR3	CCR1
ADA	a2b1 complex	LRP1
ADAM10	a2b1 complex	CKLF
ADAM15	a2b1 complex	SIRPA
ADAM17	aVb3 complex	SELPLG
ADAM8	a2b1 complex	GRN
ADAM9	a2b1 complex	RPS19
ADAMTS1	a2b1 complex	TNFRSF11A
ADAMTS12	VEGFB	TNFRSF14
ADAMTS9	CD44	CD47
ADARB1	HBEGF	MIF
ADD2	CADM1	CXCL16
ADGRA2	TNFRSF14	NOTCH1
ADGRB1	ADGRE5	TNFRSF10D
ADGRE2	SEMA4D	APP
ADGRG1	EFNB1	VEGFB
ADGRG3	TNFRSF10D
ADGRL3	VEGFA
ADIPOQ	a2b1 complex
ADIPOR1	a2b1 complex
ADIPOR2	a2b1 complex
ADORA1	aVb3 complex
ADORA3	a2b1 complex
ADRA2A	a2b1 complex
ADTRP	a2b1 complex
AFDN	CADM1
AGER	ERFE
AGO2	CLEC2D
AGT	aVb1 complex
AGTR1	TNFRSF12A
AGTR2	TNFRSF9
AIF1	GRN
AIMP1	TNFRSF10D
AIRE	CD44
AJUBA	aVb3 complex
AKAP12	a5b1 complex
AKIRIN1	aVb3 complex
AKT1	a2b1 complex
AKT2	aVb5 complex
AKT3	a2b1 complex
ALKBH1	aVb3 complex
ALOX12	a5b1 complex
ALOX15B	aXb2 complex
ALOX5	aMb2 complex
ALX1	a2b1 complex
AMOT	a2b1 complex
AMOTL1	MIF
AMOTL2	GRN
ANG	COPA
ANGPT1	a2b1 complex
ANGPT2	a2b1 complex
ANGPT4	a2b1 complex
ANGPTL3	a2b1 complex
ANKS1A	a2b1 complex
ANLN	aVb3 complex
ANO6	TGFbeta receptor1
ANXA1	TGFbeta receptor2
ANXA3	a2b1 complex
ANXA6	a2b1 complex
APC	a2b1 complex
APC2	a2b1 complex
APELA	PILRA
APEX1	EFNB1
APOA1	CKLF
APOB	a2b1 complex
APOD	aVb3 complex
APOE	LRP1
APOH	XPR1
APP	EFNB1
APPL1	a2b1 complex
APPL2	a2b1 complex
ARC	a2b1 complex
ARF4	aVb3 complex
ARF6	LIF
ARHGAP24	EFNB1
ARHGAP35	CD44
ARHGAP4	a2b1 complex
ARHGDIB	a2b1 complex
ARHGEF16	aVb3 complex
ARHGEF2	SLC7A1
ARHGEF39	TNFRSF14
ARHGEF7	ADGRE5
ARID2	SLC7A1
ARID5B	aVb3 complex
ARL13B	CD44
ARPC5	PTGER4
ARPC5L	ALOX5AP
ARPIN	TNFRSF14
ARRB2	ADGRE5
ARSB	TNFRSF10D
ARTN	SLC1A5
ARX	CD44
ASAP3	RIPK1
ASCL1	aVb1 complex
ASTN1	VEGFA
ASTN2	a2b1 complex
ATM	a2b1 complex
ATOH1	a2b1 complex
ATOH8	aVb3 complex
ATP1B1	TNFRSF12A
ATP1B2	GRN
ATP1B3	aVb3 complex
ATP2B4	a5b1 complex
ATP5F1A	a2b1 complex
ATP5F1B	aVb3 complex
ATP7A	a5b1 complex
ATP8A1	aXb2 complex
ATRN	a2b1 complex
ATRNL1	a2b1 complex
AUTS2	EFNB1
AVL9	CKLF
AXL	a2b1 complex
AZU1	aVb3 complex
B4GALT1	EFNB1
BAG4	aMb2 complex
BAMBI	TGFbeta receptor1
BARHL1	NOTCH2
BARHL2	GRN
BAX	LRP1
BCAR1	FAM3C
BCAS3	VEGFB
BCL11B	TGFbeta receptor2
BCL2	VEGFA
BDKRB1	VEGFB
BEX4	NOTCH1
BIN2	NOTCH2
BIN3	SELL
BMERB1	EFNB1
BMP10	a2b1 complex
BMP2	a2b1 complex
BMP4	aVb3 complex
BMP5	VEGFA
BMP7	VEGFB
BMPER	aVb3 complex
BMPR1A	TNFRSF10D
BMPR2	CD96
BRAT1	a2b1 complex
BSG	TNFRSF14
BST1	ADGRE5
BST2	SLC1A5
BTG1	CD44
BVES	VEGFA
C10orf99	TNFRSF12A
C1QBP	GRN
C3AR1	GRN
C5	VEGFB
C5AR1	VEGFA
C5AR2	SEMA4D
C8orf44-SGK3	HAVCR2
CALCA	DAG1
CALR	DPP4
CAMK1D	CD47
CAMK2A	FAM3C
CAMK2B	aXb2 complex
CAMSAP3	aVb3 complex
CAP1	GAL
CAPN7	CD44
CARD10	ALOX5AP
CARMIL1	APP
CARMIL2	COPA
CASS4	SPN
CAV1	MIF
CBLL1	EFNB1
CCAR1	ERFE
CCBE1	TNFRSF9
CCDC141	CD44
CCDC88A	SEMA7A
CCK	aVb3 complex
CCKAR	CSF1
CCL1	CCR1
CCL11	DPP4
CCL13	CD47
CCL14	DAG1
CCL15	ICOS
CCL16	RIPK1
CCL17	CCR1
CCL18	CCR1
CCL19	ADRB2
CCL2	LILRB4
CCL20	SLC7A1
CCL21	PLXND1
CCL22	VSIR
CCL23	HEBP1
CCL24	IDE
CCL25	TNFSF13B
CCL26	aMb2 complex
CCL27	LRP1
CCL28	EPHB2
CCL3	RPS19
CCL3L1	HBEGF
CCL3L3	NOTCH1
CCL4	ICOS
CCL5	PTGER4
CCL7	TNFRSF14
CCL8	ADGRE5
CCN1	TNFRSF12A
CCN2	GRN
CCN3	TNFRSF9
CCN4	CCR1
CCR1	DPP4
CCR10	SLC7A1
CCR2	VSIR
CCR3	HBEGF
CCR4	FAM3C
CCR5	TNFRSF10D
CCR6	TNFRSF14
CCR7	CD58
CCR8	SELPLG
CCR9	IL15
CCRL2	NECTIN2
CD151	ALCAM
CD177	LCK
CD2	Type II IFNR
CD200	CCL20
CD200R1	LTBR
CD24	CADM1
CD244	CLEC2D
CD248	CD86
CD274	CXCL16
CD2AP	TNFRSF14
CD300A	ADGRE5
CD300H	TNFRSF12A
CD34	TNFRSF9
CD40	TNFRSF10D
CD44	RIPK1
CD47	GRN
CD48	SEMA4D
CD58	EFNB1
CD63	ERFE
CD74	aVb3 complex
CD81	TGFbeta receptor1
CD84	LTB
CD9	TGFbeta receptor1
CD99	CADM1
CD99L2	aVb1 complex
CDC42	a2b1 complex
CDC42BPA	a2b1 complex
CDC42BPB	a2b1 complex
CDH1	aVb3 complex
CDH13	aVb3 complex
CDH2	a5b1 complex
CDH5	a2b1 complex
CDK1	aVb3 complex
CDK5	a5b1 complex
CDK5R1	aXb2 complex
CDK5R2	EFNB1
CDKL5	CKLF
CDKN2B-AS1	a2b1 complex
CEACAM1	aVb3 complex
CEACAM3	TGFbeta receptor2
CEACAM5	aVb3 complex
CEACAM6	TNFRSF10D
CEACAM8	a2b1 complex
CELSR1	aMb2 complex
CELSR2	PILRA
CEMIP	CLEC2D
CEND1	a2b1 complex
CENPV	aVb5 complex
CEP43	a2b1 complex
CER1	a2b1 complex
CERS2	SLC7A1
CGA	a2b1 complex
CH25H	a2b1 complex
CHGA	MIF
CHRD	GRN
CIB1	COPA
CITED2	a2b1 complex
CKLF	a2b1 complex
CLASP1	a2b1 complex
CLASP2	a2b1 complex
CLDN1	a2b1 complex
CLDN19	aVb3 complex
CLDN3	TGFbeta receptor1
CLDN4	TGFbeta receptor2
CLDN5	LRP1
CLEC14A	XPR1
CLEC7A	EFNB1
CLIC4	a2b1 complex
CLN3	a2b1 complex
CMKLR1	a2b1 complex
CNR2	aVb3 complex
COL1A1	LIF
COL1A2	TGFR
COL3A1	FZD1
COL5A1	FZD1
CORO1A	FZD5
CORO1B	SEMA4D
CORO1C	TNFRSF11A
CORO6	TGFbeta receptor2
CPNE3	SIRPA
CRB2	FPR3
CREB3	FAM3C
CRK	TNFRSF14
CRKL	ADGRE5
CRTAM	TNFRSF12A
CSF1	TNFRSF9
CSF1R	GRN
CSF3R	SEMA4D
CSNK2B	CADM1
CSPG4	aVb1 complex
CTHRC1	a2b1 complex
CTNNA1	a2b1 complex
CTNNA2	a2b1 complex
CTNNA3	aVb3 complex
CTSH	aVb3 complex
CTTN	a5b1 complex
CUL3	a2b1 complex
CX3CL1	aVb3 complex
CX3CR1	a5b1 complex
CXADR	aXb2 complex
CXCL1	aVb3 complex
CXCL10	TNFRSF10D
CXCL11	a2b1 complex
CXCL12	aMb2 complex
CXCL13	a2b1 complex
CXCL14	aVb5 complex
CXCL16	a2b1 complex
CXCL17	a2b1 complex
CXCL2	SLC7A1
CXCL3	MIF
CXCL5	GRN
CXCL6	COPA
CXCL8	a2b1 complex
CXCL9	a2b1 complex
CXCR1	a2b1 complex
CXCR2	a2b1 complex
CXCR3	a2b1 complex
CXCR4	aVb3 complex
CXCR5	TGFbeta receptor1
CXCR6	TGFbeta receptor2
CYP1B1	TGFR
CYP7B1	NOTCH2
CYRIB	FAM3C
DAB1	IL15
DAB2	CD44
DAB2IP	a2b1 complex
DACH1	a2b1 complex
DAG1	a2b1 complex
DAPK2	a2b1 complex
DAPK3	NECTIN4
DBH	LTB
DCC	PILRA
DCDC2	VEGFB
DCHS1	TNFRSF14
DCLK1	ADGRE5
DCN	TNFRSF12A
DCX	TNFRSF9
DDIT4	GRN
DDR1	SEMA4D
DDR2	aVb1 complex
DDRGK1	aVb3 complex
DDT	a5b1 complex
DDX58	aVb3 complex
DEFA1	TNFRSF10D
DEFA1B	a2b1 complex
DEFB103A	FAM3C
DEFB103B	DPP4
DEFB104A	GAL
DEFB104B	EFNB1
DEFB109B	aVb3 complex
DEFB124	SEMA7A
DEFB130A	SLC1A5
DEFB130B	CD44
DEFB4A	aVb3 complex
DEPDC1B	GRN
DGKZ	DPP4
DISC1	HBEGF
DIXDC1	HAVCR2
DLC1	DAG1
DLG5	CD47
DLL4	aXb2 complex
DMRT1	CD44
DMTN	ALOX5AP
DNAAF4	APP
DNAI3	COPA
DNAJA4	SPN
DNER	MIF
DNM1L	CSF1
DOCK1	CD47
DOCK10	DAG1
DOCK4	ICOS
DOCK5	RIPK1
DOCK7	CCR1
DOCK8	CCR1
DOK2	ADRB2
DPEP1	LILRB4
DPP4	HEBP1
DPYSL3	IDE
DRD1	TNFSF13B
DRD2	aMb2 complex
DRGX	EPHB2
DUSP1	RPS19
DUSP10	PTGER4
DUSP22	SEMA4D
DUSP3	LSR
ECM1	NETO2
EDN1	VSIR
EDN2	SLC7A1
EDN3	NOTCH1
EDNRB	LRP1
EFHC1	TNFRSF14
EFNA1	ADGRE5
EFNB1	TNFRSF12A
EFNB2	TNFRSF9
EFS	GRN
EGF	SEMA4D
EGFR	FAM3C
EGR3	DPP4
ELANE	GAL
ELMO1	EFNB1
ELMO2	aVb3 complex
ELMO3	SEMA7A
ELP3	SLC1A5
ELP5	CD44
ELP6	aVb3 complex
EMC10	GRN
EMILIN1	DPP4
EMP2	HBEGF
EMX2	HAVCR2
ENG	aXb2 complex
ENPEP	CD44
ENPP2	ALOX5AP
EPB41L4B	APP
EPB41L5	COPA
EPCAM	MIF
EPHA1	DAG1
EPHA2	ICOS
EPHA3	RIPK1
EPHA4	CCR1
EPHA8	CCR1
EPHB1	ADRB2
EPHB3	LILRB4
EPHB4	SLC7A1
EPPK1	NOTCH1
EPS8	TNFRSF10D
EPX	CCR1
ERBB4	SLC7A1
ESAM	IL15
ETS1	CD44
EVL	TNFRSF14
EVX1	CD58
EXT1	SELPLG
F10	NECTIN2
F11R	ALCAM
F2	LCK
F2R	Type II IFNR
F2RL1	TNFRSF10D
F3	DAG1
F7	CCL20
FADD
FAM107A
FAM110C
FAM83D
FAM83H
FAM89B
FAP
FAT1
FAT2
FBXO31
FBXO45
FBXO5
FBXW7
FCAMR
FCER1G
FER
FERMT1
FERMT2
FERMT3
FEZF1
FEZF2
FFAR2
FGF1
FGF10
FGF13
FGF16
FGF17
FGF18
FGF19
FGF2
FGF20
FGF21
FGF22
FGF23
FGF3
FGF4
FGF5
FGF6
FGF7
FGF8
FGF9
FGFBP1
FGFR1
FGFR4
FGR
FLCN
FLNA
FLRT2
FLRT3
FLT1
FLT4
FMNL1
FMNL2
FMNL3
FN1
FOLR1
FOXB1
FOXC1
FOXC2
FOXE1
FOXF1
FOXG1
FOXJ1
FOXN1
FOXO3
FOXO4
FOXP1
FPR2
FRMD5
FSCN1
FSCN2
FSCN3
FSHB
FSTL1
FUT1
FUT3
FUT4
FUT7
FUT8
FUT9
FUZ
FYN
FZD3
GAB1
GADD45A
GAS6
GATA2
GATA3
GBA
GBF1
GBX2
GCNT1
GCNT2
GCSAM
GCSAML
GDF2
GDNF
GFRA3
GFUS
GIPC1
GJA1
GLG1
GLI3
GLIPR2
GLUL
GNA12
GNAI2
GNRH1
GOLPH3
GP2
GP6
GPC1
GPC2
GPC3
GPC4
GPC5
GPC6
GPER1
GPI
GPLD1
GPM6A
GPNMB
GPR15
GPR183
GPSM3
GPX1
GRB14
GRB2
GRB7
GREM1
GRN
GSK3A
GSTP1
GSX2
GTPBP4
GTSE1
GYPA
GYPB
GYPC
H2BC1
HACE1
HAND2
HAS1
HAS2
HBEGF
HCK
HDAC4
HDAC5
HDAC6
HDAC7
HDAC9
HES1
HEXB
HGF
HIF1A
HMGB1
HMGB2
HMOX1
HOXA5
HOXA7
HOXB9
HRAS
HRG
HRH1
HSD3B7
HSPA5
HSPB1
HTR2B
HTR6
HYAL1
HYAL2
ICAM1
ID1
IDH2
IFITM1
IFNG
IGF1
IGF1R
IGFBP3
IGFBP5
IGFBP6
IGHA1
IGHA2
IGHM
IGHV1-69
IGHV1OR15-1
IGHV2-5
IGHV2-70
IGHV3-11
IGHV3-13
IGHV3-23
IGHV3-30
IGHV3-33
IGHV3-48
IGHV3-53
IGHV3-7
IGHV4-34
IGHV4-39
IGHV4-59
IGKC
IGKV1-12
IGKV1-16
IGKV1-17
IGKV1-39
IGKV1-5
IGKV1D-12
IGKV1D-33
IGKV1D-39
IGKV2-28
IGKV2-29
IGKV2-30
IGKV2-40
IGKV2D-28
IGKV2D-30
IGKV3-15
IGKV3-20
IGKV3D-11
IGKV3D-20
IGKV4-1
IGKV5-2
IGLC1
IGLC2
IGLC3
IGLC6
IGLC7
IGLL1
IGLV1-40
IGLV1-44
IGLV1-47
IGLV1-51
IGLV2-11
IGLV2-14
IGLV2-23
IGLV2-8
IGLV3-1
IGLV3-19
IGLV3-21
IGLV3-25
IGLV3-27
IGLV6-57
IGLV7-43
IGSF10
IL10
IL12A
IL12B
IL16
IL17A
IL17RC
IL1B
IL1R1
IL23A
IL24
IL27RA
IL33
IL34
IL4
IL6
IL6R
INPP5D
INS
INSL3
INSM1
INSR
IQGAP1
IQSEC1
IRAK4
IRS2
ISL1
ITGA1
ITGA11
ITGA2
ITGA2B
ITGA3
ITGA4
ITGA5
ITGA6
ITGAL
ITGAM
ITGAV
ITGAX
ITGB1
ITGB1BP1
ITGB2
ITGB3
ITGB4
ITGB5
ITGB6
ITGB7
ITGB8
ITGBL1
JAG1
JAGN1
JAK2
JAM2
JAM3
JAML
JCAD
JCHAIN
JUP
KANK1
KANK2
KCTD13
KDR
KIAA0319
KIF14
KIF20B
KIF2A
KIRREL3
KIT
KITLG
KLF4
KLRC4-KLRK1
KLRK1
KNSTRN
KRIT1
KRT16
KRT2
L1CAM
LAMA1
LAMA2
LAMA3
LAMA4
LAMA5
LAMB1
LAMB2
LAMB3
LAMB4
LAMC1
LAMC2
LAMC3
LAMTOR2
LBP
LCK
LCP1
LDB1
LDB2
LDLRAD4
LEF1
LEP
LGALS12
LGALS3
LGALS8
LGALS9
LGMN
LGR6
LHX1
LHX6
LIMA1
LIMCH1
LIMD1
LMNA
LMO4
LOX
LOXL2
LPAR1
LPXN
LRCH1
LRIG2
LRP1
LRP12
LRP5
LRP8
LRRC15
LRRK2
LURAP1
LYN
LYST
MACF1
MACIR
MADCAM1
MAG
MAGI2
MAP1B
MAP2K3
MAP2K5
MAP3K3
MAP4K4
MAPK1
MAPK15
MAPK3
MAPRE1
MAPRE2
MARK1
MARK2
MARVELD3
MAZ
MBOAT7
MCAM
MCC
MCOLN2
MCTP1
MCU
MDGA1
MDK
MEAK7
MECP2
MEF2C
MEGF10
MEGF8
MEGF9
MEOX2
MERTK
MESP1
MET
MGAT3
MGAT5
MIA3
MIEN1
MIF
MIIP
MINK1
MIR1-1
MIR101-1
MIR10A
MIR10B
MIR126
MIR129-1
MIR1290
MIR1298
MIR132
MIR133A1
MIR133B
MIR135B
MIR137
MIR138-1
MIR140
MIR143
MIR145
MIR146A
MIR149
MIR150
MIR152
MIR15A
MIR15B
MIR16-1
MIR181A2
MIR181B1
MIR181D
MIR182
MIR188
MIR1908
MIR193A
MIR196A1
MIR199A1
MIR19B1
MIR200A
MIR200B
MIR200C
MIR204
MIR206
MIR208A
MIR20A
MIR21
MIR210
MIR212
MIR214
MIR218-1
MIR22
MIR221
MIR222
MIR223
MIR2355
MIR23A
MIR24-1
MIR26A1
MIR27A
MIR27B
MIR296
MIR29A
MIR29B1
MIR29C
MIR30A
MIR30C2
MIR31
MIR320A
MIR329-1
MIR338
MIR342
MIR34A
MIR361
MIR362
MIR410
MIR424
MIR448
MIR449A
MIR451A
MIR483
MIR487B
MIR491
MIR492
MIR494
MIR495
MIR497
MIR499A
MIR503
MIR505
MIR518B
MIR588
MIR590
MIR638
MIR640
MIR665
MIR711
MIR892B
MIR9-1
MIR92A1
MIR93
MIR939
MIRLET7F1
MIRLET7G
MISP
MITF
MIXL1
MMP1
MMP12
MMP14
MMP28
MMP7
MMP9
MMRN2
MOSPD2
MPP1
MRTFA
MSMP
MSN
MST1
MST1L
MST1R
MSTN
MTA2
MTOR
MTUS1
MYADM
MYD88
MYH9
MYLK
MYO18A
MYO1C
MYO1G
MYOC
MYOCD
NANOS1
NARS1
NAV1
NAV3
NBL1
NCK1
NCK2
NCKAP1
NCKAP1L
NDE1
NDEL1
NDN
NDNF
NDRG4
NEDD9
NET1
NEXMIF
NEXN
NF1
NF2
NFATC2
NFE2L2
NHLH2
NIPBL
NISCH
NKD1
NKX2-1
NKX2-3
NKX6-1
NLRP3
NOD2
NODAL
NOG
NOS3
NOTCH1
NOX1
NOX4
NR2E1
NR2F2
NR4A1
NR4A2
NR4A3
NRCAM
NRG3
NRP1
NRP2
NRTN
NSMF
NTF3
NTN1
NTN4
NTNG1
NTNG2
NTRK2
NTRK3
NUMB
NUP85
NUS1
OLIG3
OLR1
ONECUT1
ONECUT2
OPHN1
OR51E2
OSBPL8
OSGIN1
OVOL2
OXSR1
P2RX4
P2RY1
P2RY12
PADI2
PAFAH1B1
PAK1
PAK3
PAK4
PAK5
PALLD
PARD6B
PARP9
PARVA
PATZ1
PAXIP1
PBLD
PCM1
PDCD10
PDCD6
PDE4B
PDGFA
PDGFB
PDGFC
PDGFD
PDGFRA
PDGFRB
PDILT
PDLIM1
PDPK1
PDPN
PDXDC1
PDXDC2P-NPIPB14P
PEAK1
PECAM1
PEX13
PEX7
PF4
PF4V1
PFN1
PFN2
PGF
PHACTR1
PHACTR4
PHB2
PHLDA2
PHLDB2
PHOX2B
PIK3C2A
PIK3C2B
PIK3C2G
PIK3CA
PIK3CB
PIK3CD
PIK3CG
PIK3R1
PIK3R2
PIK3R3
PIKFYVE
PIP5K1A
PIP5K1C
PIP5KL1
PITX2
PKN1
PKN2
PKN3
PLA2G1B
PLA2G7
PLAA
PLAT
PLAU
PLCB1
PLCG1
PLCG2
PLEKHG5
PLEKHO1
PLET1
PLK2
PLP1
PLPP3
PLVAP
PLXNA1
PLXNA2
PLXNA3
PLXNA4
PLXNB1
PLXNB2
PLXNB3
PLXNC1
PLXND1
PML
PODN
PODXL
PODXL2
POMGNT2
POSTN
POU3F2
POU3F3
POU4F1
PPARD
PPARG
PPARGC1A
PPBP
PPIA
PPIB
PPIL2
PPM1F
PPP1R9B
PPP3CA
PRAG1
PRCP
PREX1
PRKCA
PRKCD
PRKCE
PRKCI
PRKCQ
PRKCZ
PRKD1
PRKD2
PRKG1
PRKX
PROS1
PROX1
PRPF40A
PRR5L
PRSS3
PRSS37
PRSS3P2
PRSS56
PRTN3
PSEN1
PSG1
PSG2
PSTPIP2
PTAFR
PTEN
PTGER4
PTGS2
PTK2
PTK2B
PTK6
PTK7
PTN
PTP4A1
PTP4A3
PTPN11
PTPN23
PTPN6
PTPRC
PTPRF
PTPRG
PTPRJ
PTPRK
PTPRM
PTPRO
PTPRR
PTPRT
PTPRU
PXN
PYCARD
RAB11A
RAB13
RAB1A
RAB25
RAC1
RAC2
RACK1
RADIL
RAP2A
RAP2B
RAP2C
RAPGEF2
RARRES2
RASGEF1A
RBFOX2
RCC2
RDX
RECK
RELN
RERE
RET
RFFL
RGCC
RHBDF1
RHOA
RHOB
RHOBTB3
RHOC
RHOD
RHOF
RHOG
RHOH
RHOJ
RHOQ
RHOU
RHOV
RIC8A
RIN2
RIN3
RIPK3
RIPOR1
RIPOR2
RND1
RND2
RND3
RNF20
RNF41
ROBO1
ROBO4
ROCK1
ROCK2
ROR2
RPS19
RPS6KB1
RRAS
RRAS2
RREB1
RTN4
RUFY3
S100A11
S100A12
S100A14
S100A2
S100A7
S100A8
S100A9
S100P
S1PR1
SAA1
SASH1
SATB2
SBDS
SCAI
SCARB1
SCG2
SCRIB
SCRT1
SCRT2
SCYL3
SDC1
SDC2
SDC3
SDC4
SDCBP
SDCCAG8
SELE
SELENOK
SELL
SELP
SELPLG
SEMA3A
SEMA3B
SEMA3C
SEMA3D
SEMA3E
SEMA3F
SEMA3G
SEMA4A
SEMA4B
SEMA4C
SEMA4D
SEMA4F
SEMA4G
SEMA5A
SEMA5B
SEMA6A
SEMA6B
SEMA6C
SEMA6D
SEMA7A
SERPINB3
SERPINE1
SERPINE2
SERPINF1
SETD2
SFRP1
SFRP2
SFTPD
SGK1
SGK3
SGPL1
SH3BP1
SH3KBP1
SH3RF1
SH3RF2
SHC1
SHH
SHROOM2
SHTN1
SINHCAF
SIRPA
SIRPG
SIRT1
SIX1
SIX2
SIX3
SIX4
SLAMF8
SLC12A2
SLC16A1
SLC16A3
SLC16A8
SLC3A2
SLC7A10
SLC7A11
SLC7A5
SLC7A6
SLC7A7
SLC7A8
SLC7A9
SLC8A1
SLC8B1
SLC9A1
SLC9A3R1
SLIT2
SLK
SLURP1
SMAD3
SMAD7
SMIM22
SMO
SMOC2
SMPD3
SMURF2
SNAI1
SNAI2
SOD2
SORL1
SOS1
SOX1
SOX10
SOX14
SOX17
SOX18
SOX8
SOX9
SP1
SP100
SPAG9
SPARC
SPATA13
SPDL1
SPEF1
SPHK1
SPN
SPNS2
SPOCK1
SPRED1
SPRY2
SRC
SRCIN1
SRF
SRGAP1
SRGAP2
SRGAP2B
SRGAP2C
SRGAP3
SRP54
SRPX2
SSH1
SST
SSTR4
ST3GAL4
STAP1
STARD13
STAT3
STAT5A
STAT5B
STC1
STK10
STK24
STK26
STK39
STK4
STRAP
STRIP2
STX4
SULF1
SUN2
SVBP
SWAP70
SYDE1
SYDE2
SYK
SYNE2
SYNJ2BP
TAC1
TACSTD2
TAFA4
TAOK2
TBCCD1
TBX1
TBX20
TBX21
TBX5
TBXA2R
TCAF1
TCAF2
TDGF1
TEK
TERT
TESK1
TGFB1
TGFB2
TGFBR1
TGFBR2
TGFBR3
TGFBR3L
THBD
THBS1
THBS4
THY1
TIAM1
TIE1
TIMP1
TIRAP
TJP1
TLX3
TMEFF2
TMEM102
TMEM18
TMEM201
TMIGD1
TMIGD3
TMSB10
TMSB15A
TMSB15B
TMSB4X
TMSB4Y
TNF
TNFAIP1
TNFAIP3
TNFAIP6
TNFRSF10A
TNFRSF10B
TNFRSF10D
TNFRSF11A
TNFRSF14
TNFRSF18
TNFSF11
TNFSF12
TNFSF18
TNN
TNR
TOP2B
TOR1A
TP53INP1
TPBG
TPM1
TRADD
TREM1
TREM2
TRIB1
TRIM32
TRIM46
TRIM55
TRIP6
TRPM2
TRPM4
TSPAN11
TSPO
TTBK2
TUBB2A
TUBB2B
TUBGCP2
TWIST1
TWIST2
TYRO3
ULK4
UMOD
UMODL1
UNC5C
UNK
USH2A
USP17L2
USP33
USP45
USP9X
USP9Y
VANGL2
VASH1
VAV1
VAV2
VAV3
VAX1
VCAM1
VCL
VEGFA
VEGFB
VEGFC
VEGFD
VIL1
VPREB1
VPREB3
VSIR
VTN
WASF2
WASHC1
WASL
WDPCP
WDR1
WNK1
WNT11
WNT4
WNT5A
WNT5B
WNT7A
WWC1
XBP1
XCL1
XCL2
XCR1
XG
YES1
ZAP70
ZC3H12A
ZEB2
ZFAND5
ZMIZ1
ZMYND8
ZNF268
ZNF304
ZNF580
ZNF609
ZNF703
ZP3
ZRANB1
